# Supplementary material for: IL-38 regulates intestinal stem cell homeostasis by inducing WNT signaling and beneficial IL-1β secretion
Source: PubMed Central journal article supplement — Proc Natl Acad Sci U S A. 2023 Oct 31;120(45):e2306476120. doi: 10.1073/pnas.2306476120 (PMC10636342; doi:10.1073/pnas.2306476120), 2023-10-31
Supplement: pnas.2306476120.sapp.pdf [file pnas.2306476120.sapp.pdf]

Supplementary

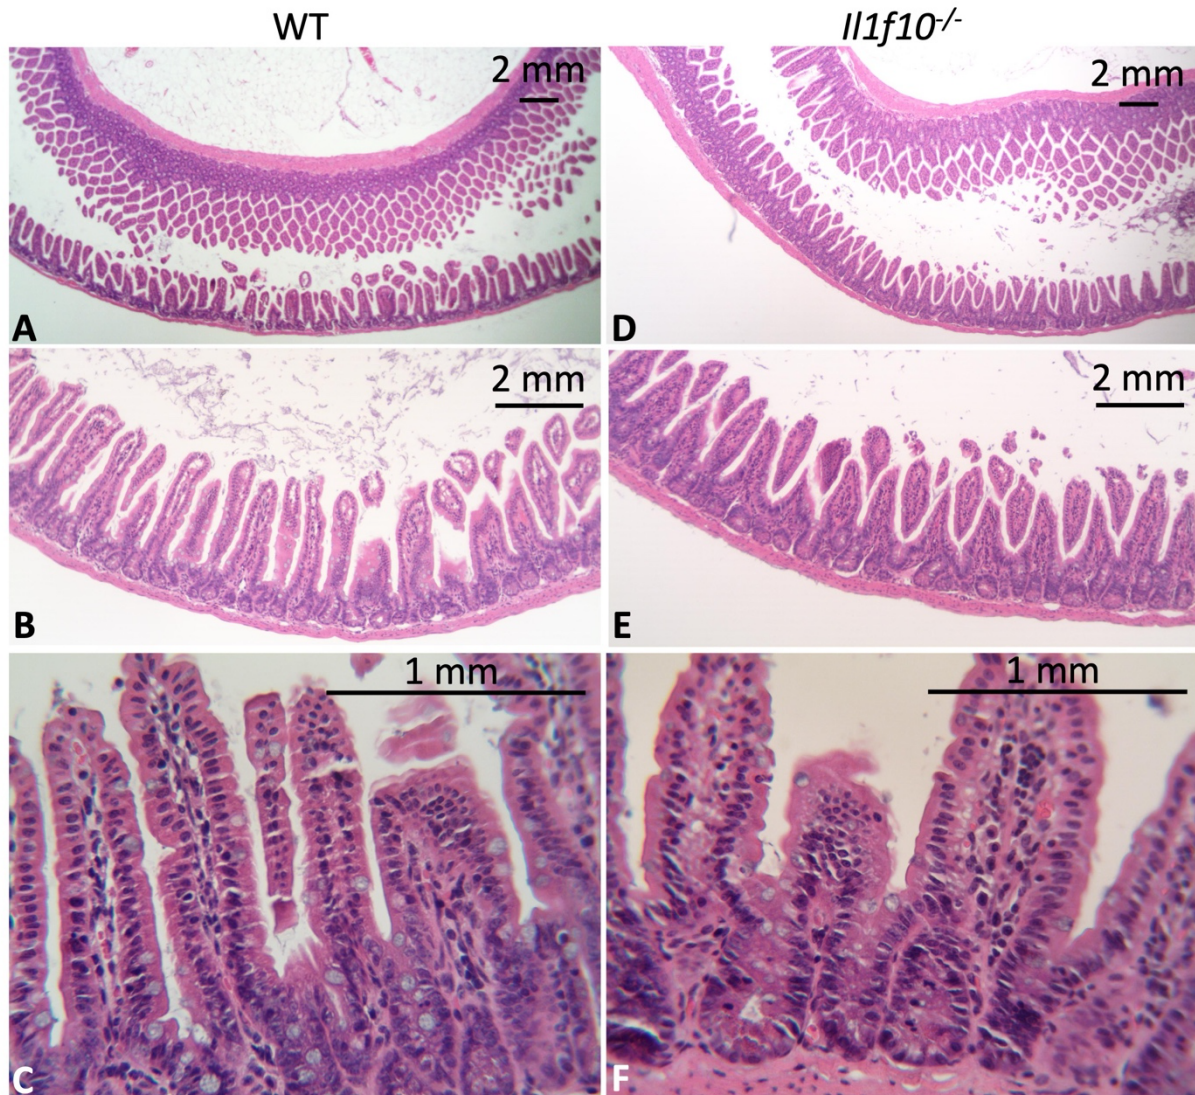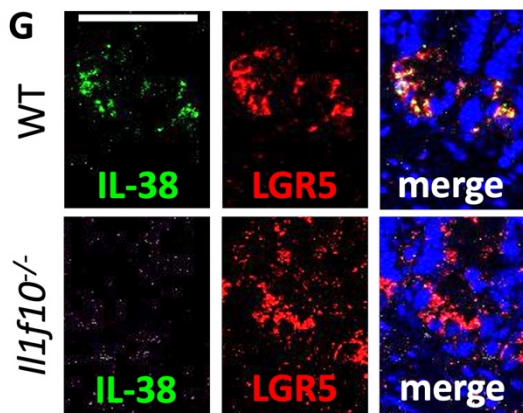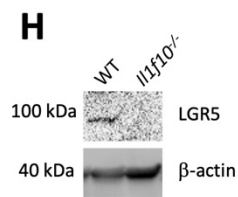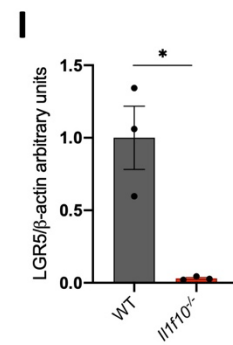

Figure S1: **Characterization of *Il1f10* deficient SI.** (A-F) Histological analysis of SI of wild type and *Il1f10*<sup>-/-</sup> mice. (G) Staining of IL-38 (green) and LGR5 (red) in wild type and *Il1f10*<sup>-/-</sup> SI. Scale bar = 50  $\mu$ m. (H) A representative western blot performed on wild type and *Il1f10* knockout intestines. (I) Histogram derived from western blot shown in (H) of LGR5 levels in wild type and *Il1f10* knockout intestines. n = 3 biological replicates for each genotype. Comparisons between wild type and *Il1f10* knockout samples were performed with Student *t*-test. \*  $p < 0.05$ . Mean  $\pm$  SEM.

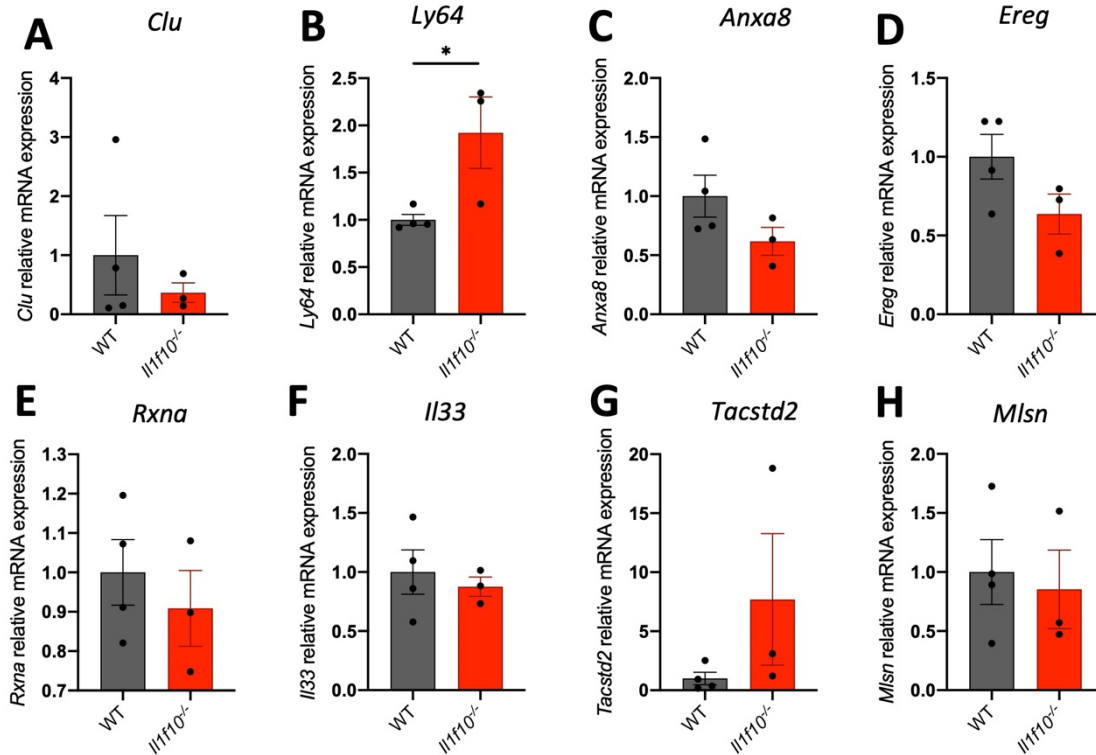

Figure S2: **Transcriptional analysis of regeneration-related genes.** (A-H) Gene expression analysis of *Clu* (A), *Ly64* (B), *Anxa8* (C), *Ereg* (D), *Rxna* (E), *Il33* (F), *Tacstd2* (G) and *Mlsln* (H) in SI samples from wild type and *Il1f10* deficient mice. Comparisons between wild type and *Il1f10* knockout samples were performed with Student *t*-test. \*  $p < 0.05$ . Mean  $\pm$  SEM.

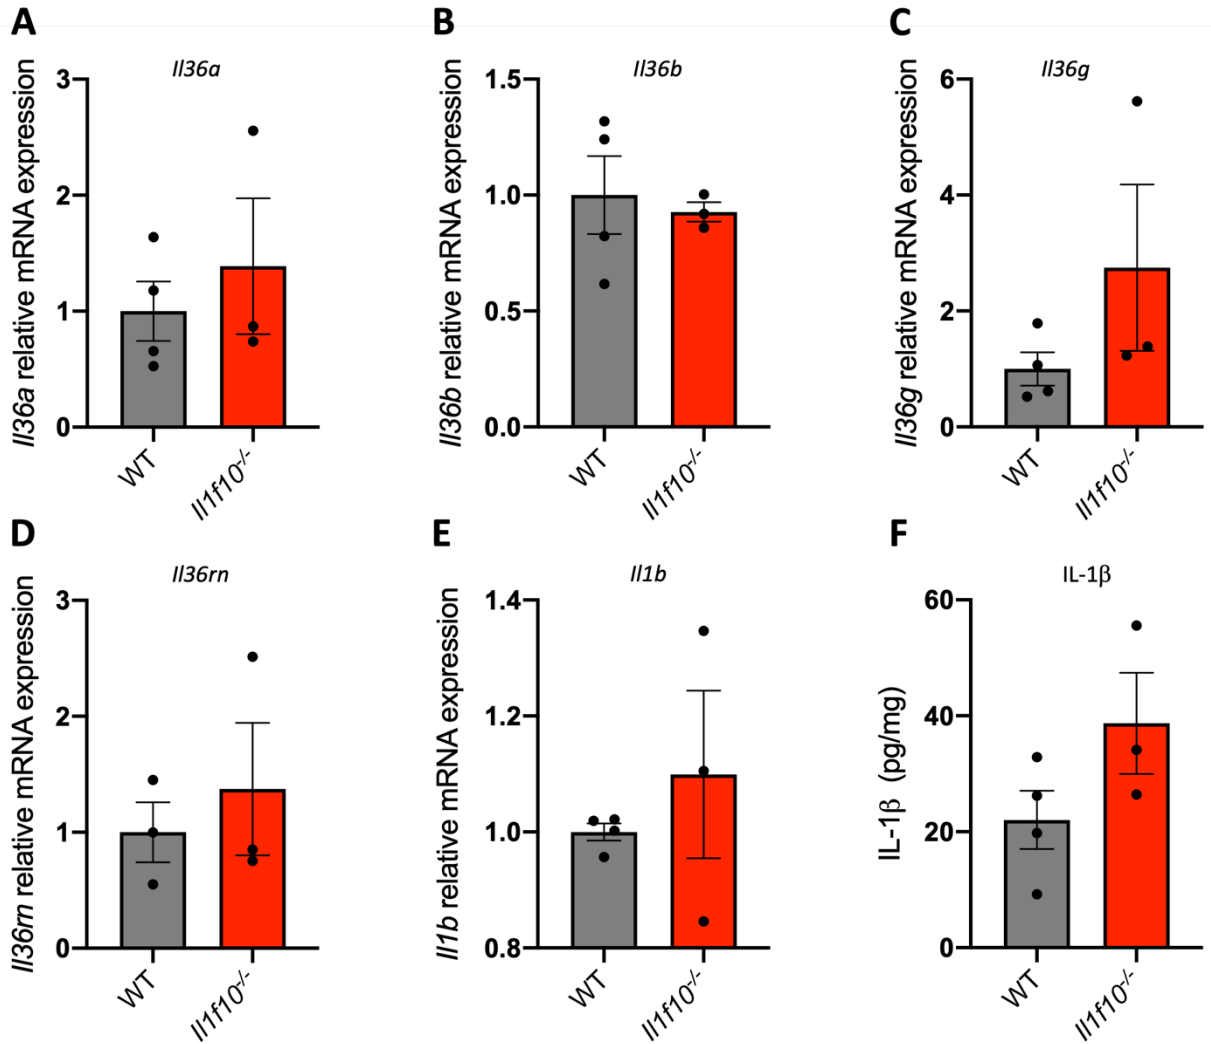

Figure S3: **Interleukins expression is not significantly altered in *I11f10* deficient intestines.** (A-E) Gene expression analysis of *I36a* (A), *I36b* (B), *I36g* (C), *I36rn* (D) and *I11b* (E) in SI samples from wild type and *I11f10* deficient mice. Comparisons between wild type and *I11f10* knockout samples were performed with Student *t*-test. (F) Intracellular IL-1β expression in the SI lysates from wild type and *I11f10* deficient mice. Comparisons between wild type and *I11f10* knockout samples were performed with Student *t*-test. Mean ± SEM.

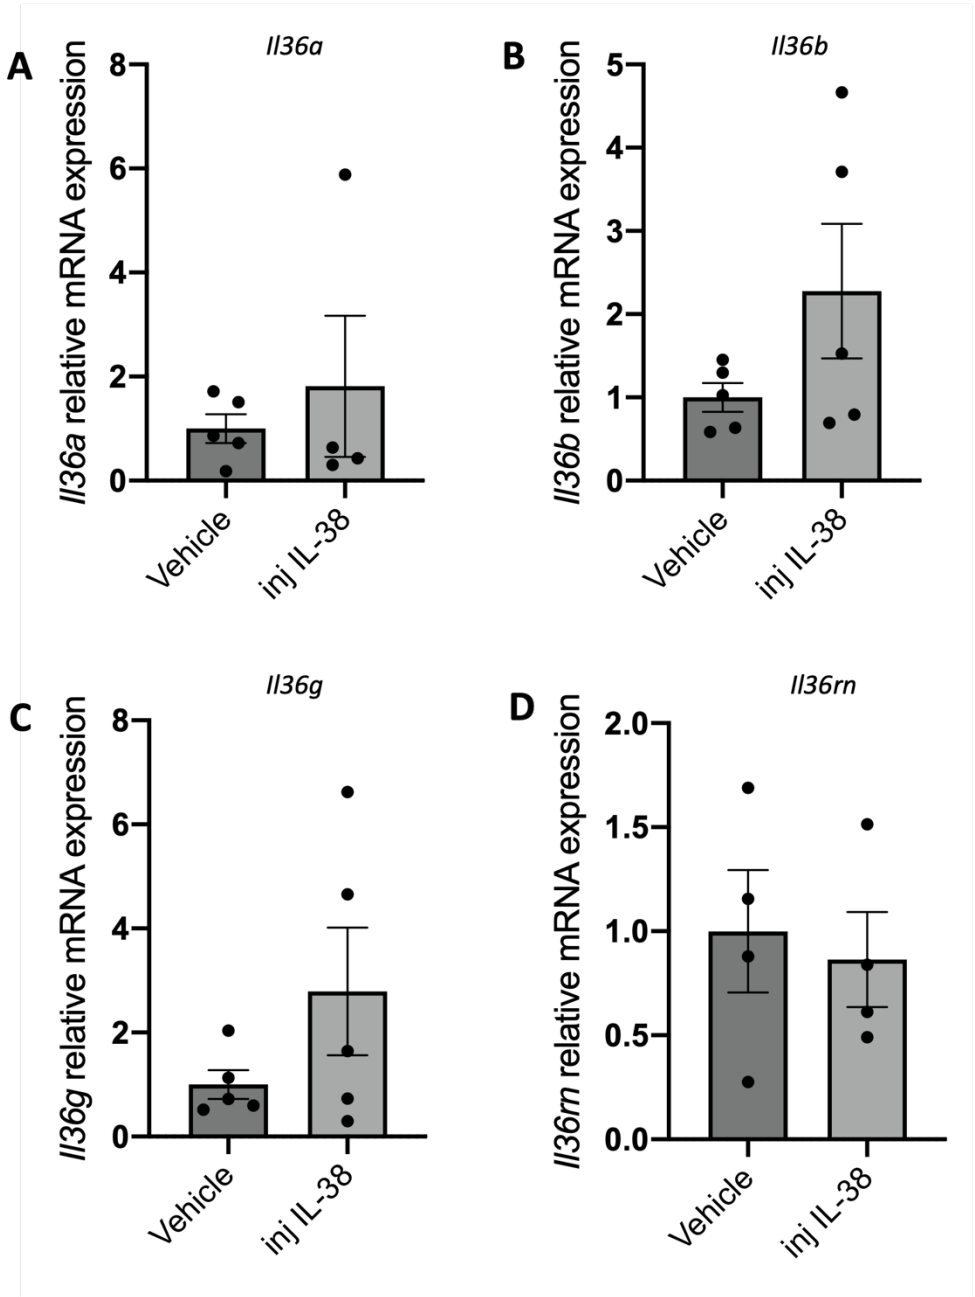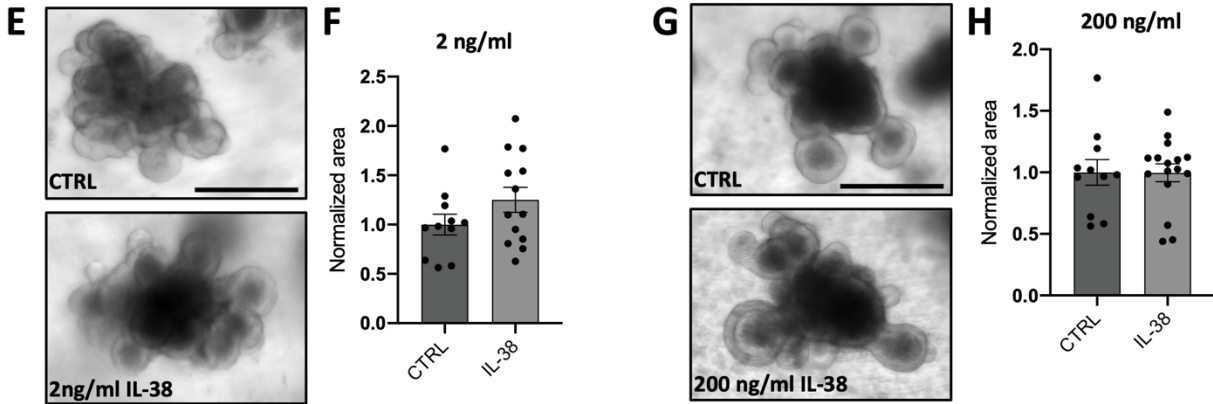



Figure S4: **Tests of IL-38 effects *in vivo* and *ex vivo*.** (A-D) Gene expression analysis of *I136a* (A), *I136b* (B), *I136g* (C), and *I136rn* (D) in SI from mice injected with PBS (Vehicle) and with 1  $\mu$ g recombinant IL-38 (inj IL-38) every day for 15 days. Comparisons between wild type and *I1f10* knockout samples were performed with Student *t*-test. Mean  $\pm$  SEM. (E) Representative pictures and measurements (F) of organoids treated with vehicle and 2 ng/ml IL-38. Each dot represents an individual organoid, organoid cultures were produced from 3 different mice and plated in three wells for each experimental condition. Scale bar: 200  $\mu$ m. Comparisons between vehicle- and 2 ng/ml IL-38-treated organoids were performed with Student's *t*-test. (G) Representative pictures and measurements (H) of organoids treated with vehicle and 200 ng/ml IL-38. Each dot represents an individual organoid, organoid cultures were produced from 3 different mice and plated in three wells for each experimental condition. Scale bar: 200  $\mu$ m. Comparisons between vehicle- and 200 ng/ml IL-38-treated organoids were performed with Student's *t*-test. Mean  $\pm$  SEM.

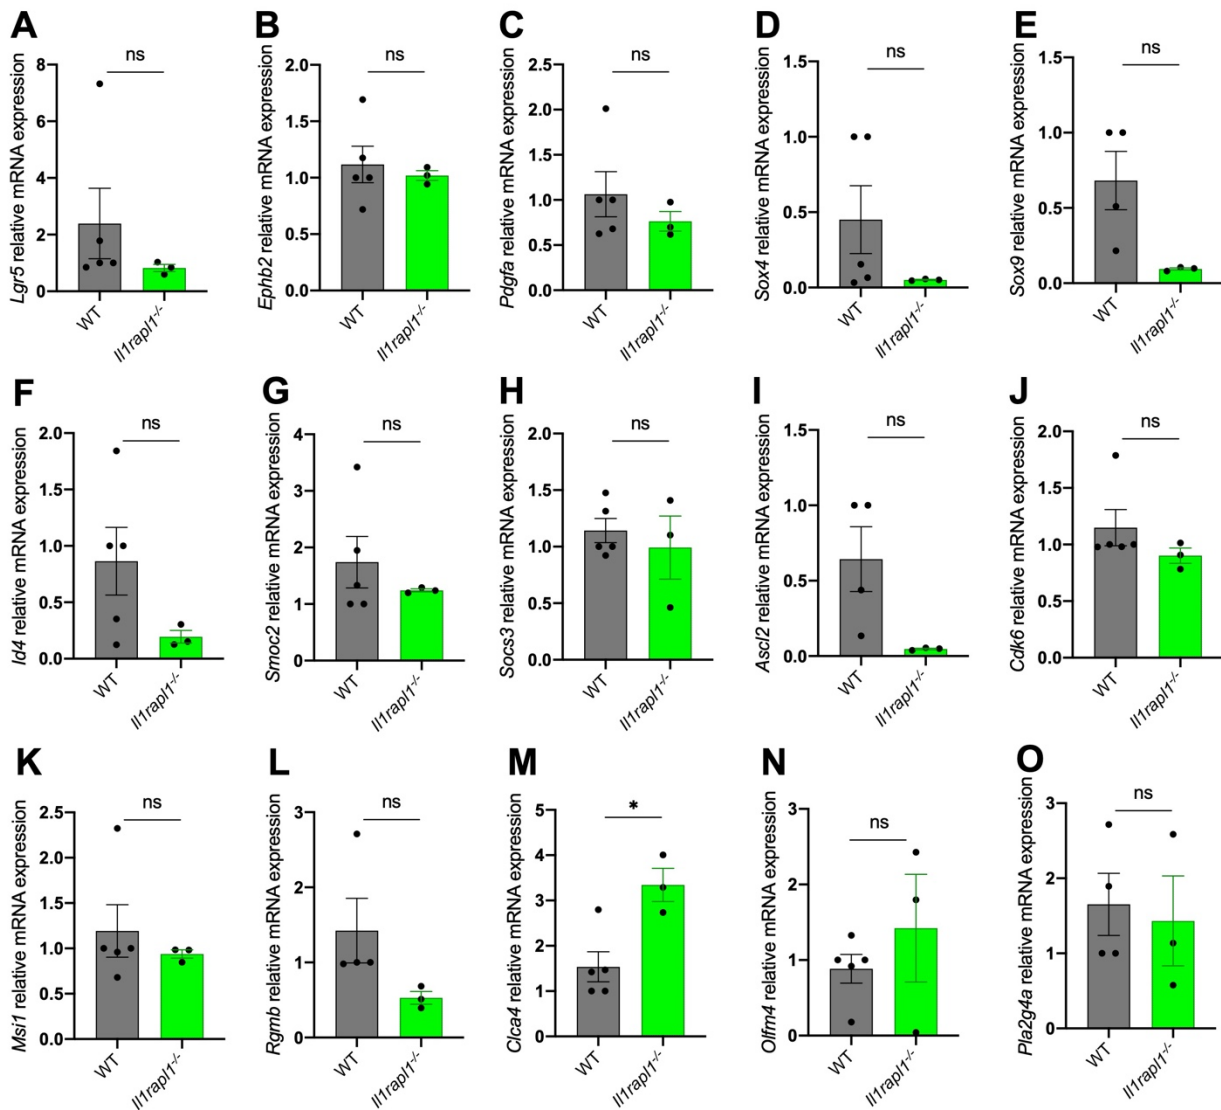

Figure S5: **Crypt markers in IL-1R9 KO intestines.** (A-O) Gene expression analysis of *Lgr5* (A), *Ephb2* (B), *Pdgfa* (C), *Sox4* (D), *Sox9* (E), *Id4* (F), *Smoc2* (G), *Socs3* (H), *Ascl2* (I), *Cdk6* (J), *Msi1* (K), *Rgmb* (L), *Clca4* (M), *Olfm4* (N) and *Pla2g4a* (O) in intestines from wild type and *Il1rap1* deficient mice. Comparisons between wild type and *Il1rap1* deficient intestines were performed with two-tailed unpaired Student's *t*-test. Wild type controls are the same used in Figure 1. \*  $p < 0.05$ , ns = not significant. Mean  $\pm$  SEM.

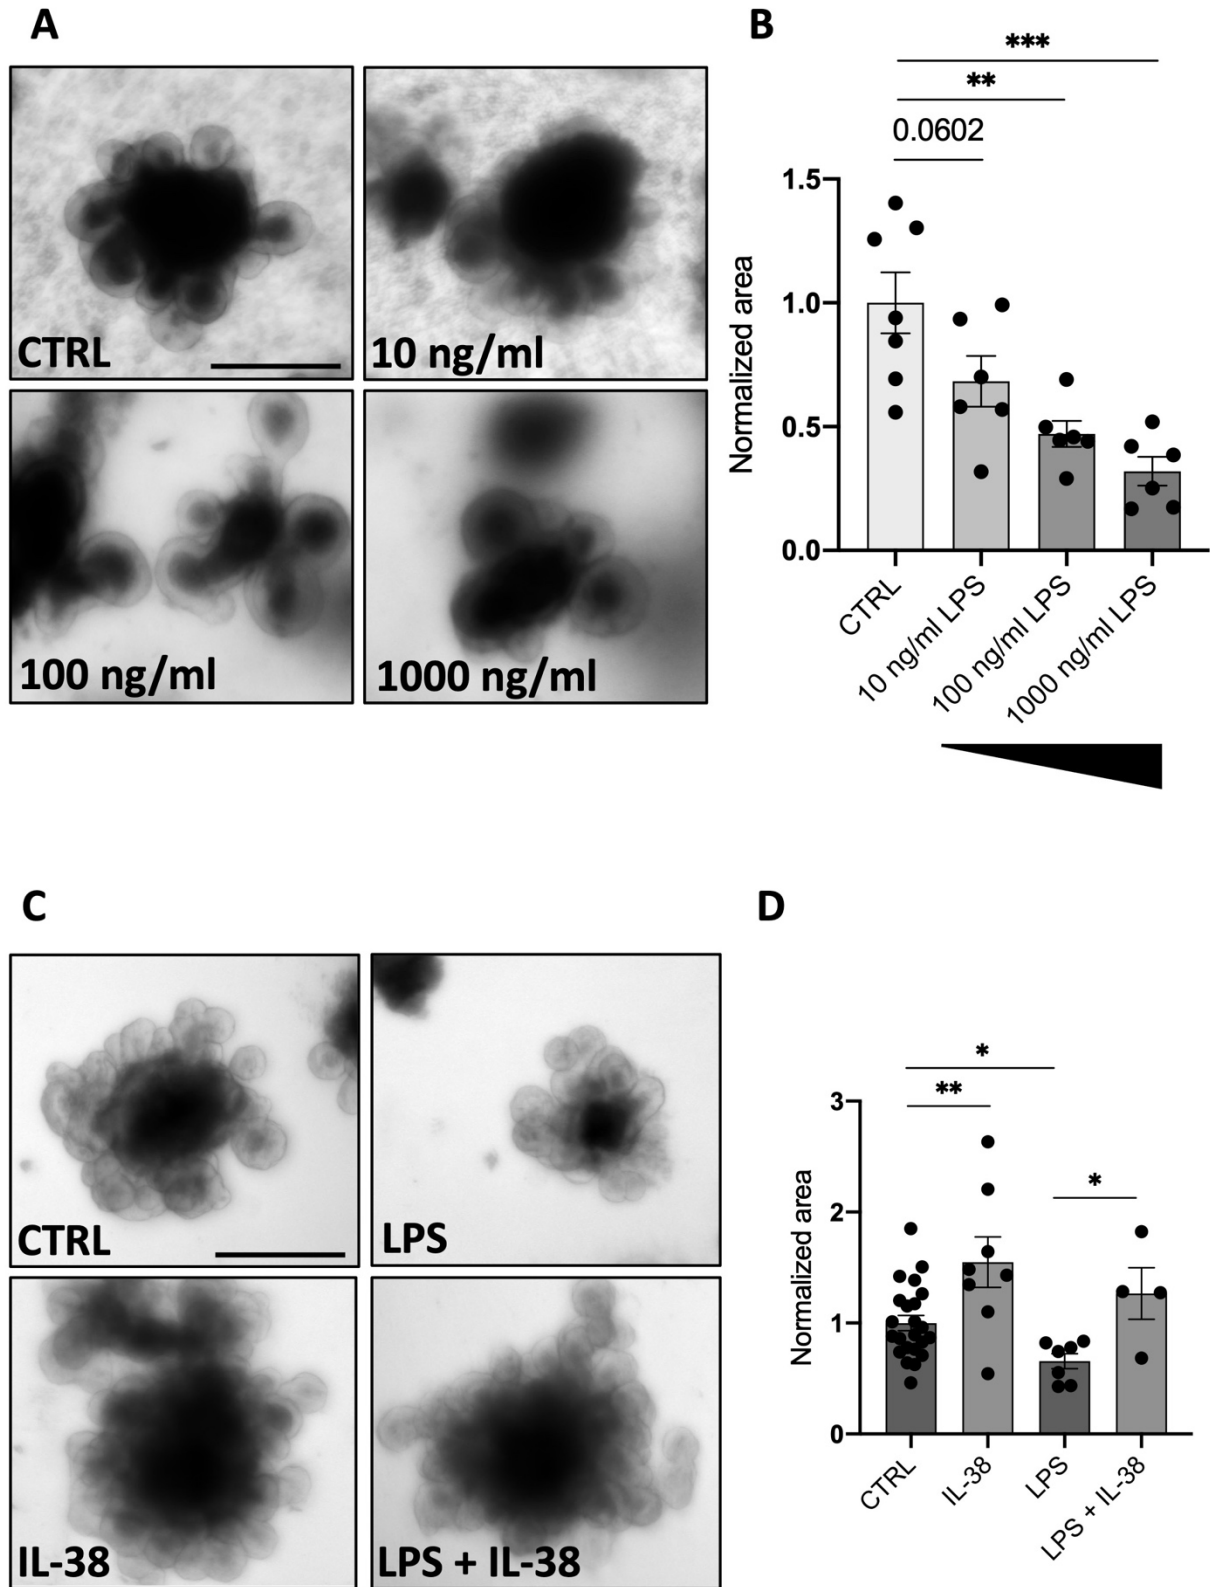

Figure S6: LPS has negative effects on organoid growth. (A) Representative pictures and measurements (B) of wild type organoids treated with vehicle, 10 ng/ml, 100 ng/ml and 1000

ng/ml LPS for 6 days. Each dot represents an individual organoid, organoid cultures were produced from 3 different mice and plated in three wells for each experimental condition. Scale bar: 200  $\mu$ m. Comparisons between the four different experimental groups were performed with One-way ANOVA. (C) Representative pictures and measurements (D) of wild type organoids treated with vehicle, 20 ng/ml IL-38, 100 ng/ml LPS, 20 ng/ml IL-38 + 100 ng/ml LPS for 6 days. Each dot represents an individual organoid, organoid cultures were produced from 3 different mice and plated in three wells for each experimental condition. Comparisons were performed with two-tailed unpaired Student *t*-test. Scale bar: 200  $\mu$ m. \**p* < 0.05; \*\**p* < 0.01; \*\*\**p* < 0.001. Mean  $\pm$  SEM.

| Gene           | Forward primer             | Reverse primer         | Reference                      |
|----------------|----------------------------|------------------------|--------------------------------|
| <i>Lgr5</i>    | GATGCTGCTCAGGGTGA          | CGGGTAGCTGACTGATGTTG   | This paper                     |
| <i>Fzd5</i>    | CTGTGCTGTGCTTCATCTCC       | CAGGGCCGGTAGTCTCATAG   | This paper                     |
| <i>Ephb2</i>   | TCTATGTCTTCCAGGTGCGG       | TTCTTGATGCTGGTCTGGT    | This paper                     |
| <i>Bmpr1a</i>  | ATGCTCCATGGCACTGGTATGA     | GGCAGTGTCTGAGCAATAGCA  | Qi <i>et al.</i> , 2017        |
| <i>Id1</i>     | ATCGCATCTTGTGTCGCTGAG      | AGTCTCTGGAGGCTGAAAAGGT | Qi <i>et al.</i> , 2017        |
| <i>Olfm4</i>   | CGAGACTATCGGATTCGCTATG     | TTGTAGGCAGCCAGAGGGAG   | Qi <i>et al.</i> , 2017        |
| <i>Ascl2</i>   | GCCTGACCAAATGCCAAGTG       | ATTTCCAAGTCTGATGCTGC   | Qi <i>et al.</i> , 2017        |
| <i>Rgmb</i>    | CACGGATCAGAAGGTGTACCA      | AGCTGTGCGCACAACACTGT   | Qi <i>et al.</i> , 2017        |
| <i>Pdgfa</i>   | GTAACACCAGCAGCGTCAAGT      | TGGCTTCTCTGACATACTCC   | Qi <i>et al.</i> , 2017        |
| <i>Sox9</i>    | GCCAGATGGACCCACCAGTAT      | TCCAAACAGGCAGGGAGATTC  | Qi <i>et al.</i> , 2017        |
| <i>Cdk6</i>    | GGCGTACCCACAGAAACCATA      | AGGTAAGGGCCATCTGAAAAC  | Qi <i>et al.</i> , 2017        |
| <i>Cdeca7</i>  | ATGTCATCAGTGTCCGAGAAA      | CCTCGCCATAGCGGTTTCG    | Qi <i>et al.</i> , 2017        |
| <i>Pla2g4a</i> | GCATTTCTTGATGGGTGTCTGG     | AGCCTCATCATCTGTCGGA    | Qi <i>et al.</i> , 2017        |
| <i>Sox4</i>    | ATGAACGCCTTTATGGTGTGG      | TCCTGGATGAACGGAATCTGT  | Qi <i>et al.</i> , 2017        |
| <i>Smoc2</i>   | CCCAAGCTCCCCTCAGAAG        | GCCACACCTGGACACAT      | Qi <i>et al.</i> , 2017        |
| <i>Clea4</i>   | GAAAGAACAACCTGTGCAAGCAAC   | CAGTCTGGGATTTGTTGGGATA | Qi <i>et al.</i> , 2017        |
| <i>Msi1</i>    | CCAGGGTTCCAAGCCACGA        | CCATAAGCCGTGAGAGGGATA  | Qi <i>et al.</i> , 2017        |
| <i>Phlda</i>   | GTGGTGATGACGGAGGGCA        | TGCTTCTGCCTGGTAGACTTG  | Qi <i>et al.</i> , 2017        |
| <i>Socs3</i>   | ATTTTCGCTTCGGGACTAGC       | AACTTGTGTGGGTGACCAT    | Carbognin <i>et al.</i> , 2016 |
| <i>Si</i>      | GGGTCCAGCTTTTATGGTGA       | TATGTGTCTGTGCCGGTTC    | Zhong <i>et al.</i> , 2015     |
| <i>ChgA</i>    | CCA ATA CCC AAT CAC CAA CC | TTGTAGCCTGCATGGAAGTG   | Zhong <i>et al.</i> , 2015     |
| <i>Tff3</i>    | GTCCAAGGGTAGCAAGCATC       | CTTGTGTGGCTGTGAGGTC    | Zhong <i>et al.</i> , 2015     |
| <i>Lyz1</i>    | CAGCTCACTAGTCGCTCCTG       | TAGAGCTGCCCTTTCATCT    | Zhong <i>et al.</i> , 2015     |
| <i>Il1rl2</i>  | CCTTTCACGTGTCATGCTGG       | CAACCAGAAAGTAGGAACGCC  | This paper                     |
| <i>Clu</i>     | GTGAAGATGACCCGCACTGTG      | AGCTCCTTGACTGCTCTGT    | This paper                     |
| <i>Ly64</i>    | GCTGATTCTTCTGTGGCCC        | CCACAATAACTGCTGCCTCC   | This paper                     |
| <i>Anxa8</i>   | AGCGTGAAGGGTAGTTCTCA       | CTTGAAGGACTTGGCAATCTG  | This paper                     |
| <i>Ereg</i>    | GCAGTTATCAGCACAAACCGT      | TCTCTCTCATGTCCACCAGG   | This paper                     |
| <i>Rxna</i>    | GTCCGCCCTTCTCTGTCAT        | CTAGTGCCGGCTTGATATCC   | This paper                     |
| <i>Il33</i>    | GATTTCCCCGGCAAAGTTCA       | TGCAGTAGACATGGCAGAATTC | This paper                     |
| <i>Tacstd2</i> | GACAACGATGGCCTTACGA        | CAGCTCGGAGTCTAGGTGAG   | This paper                     |
| <i>Mlsn</i>    | ATCGAAGTGGTCACTTCCA        | CCTTGGGTGTATGACGGTCA   | This paper                     |
| <i>Il36rn</i>  | TGCACAATAACCAGCTGCTG       | CACTGGCTTCTCCTTGAAC    | This paper                     |
| <i>Il36a</i>   | ACTCTTGAGACGAAACAGGGG      | AGAGAGGCTTTTACAGGTTCT  | This paper                     |
| <i>Il36b</i>   | ACAGATGGTATGGGTCTGAC       | TTTCTGTCTTGATCCCAGGA   | This paper                     |
| <i>Il36g</i>   | ACCCAGAGTCTTTGAACAGG       | GTCCGGGTGTGGTAAAACAG   | This paper                     |
| <i>Il1b</i>    | CAACCAACAAGTGATATTCTCCATG  | GATCCACACTTCCAGCTGCA   | Seo <i>et al.</i> , 2015       |
| <i>Il1f10</i>  | AGGATGCACATCAAAAGGCTT      | GGCCTCGGTTAGGAAGGATAC  | Jia <i>et al.</i> , 2020       |
| <i>18s</i>     | GTAACCCGTTGAACCCATT        | CCATCCAATCGGTAGTAGCG   | Tengesdal <i>et al.</i> , 2021 |

Table 1: Primer list for RT-qPCR (5'  $\rightarrow$  3' sequences).
